# Supplementary material for: The influence of adjacent Al atoms on the hydrothermal stability of H-SSZ-13: a first-principles study
Source: Royal Society of Chemistry journal article supplement (doi:10.1039/c9cp05141d), 2019-12-26
Supplement: c9cp05141d1.pdf [file c9cp05141d1.pdf]

## Supporting Information:

### The influence of adjacent Al atoms to the hydrothermal stability in

#### H-SSZ-13: a first principles study

Lu Shi<sup>a</sup>, Jiaqiang Yang<sup>a</sup>, Gurong Shen<sup>b</sup>, Yunkun Zhao<sup>c</sup>, Rong Chen<sup>d</sup>,  
Meiqing Shen<sup>b</sup>, Yanwei Wen<sup>\*a</sup> and Bin Shan<sup>\*a</sup>

*a. State Key Laboratory of Material Processing and Die and Mould Technology and School of Materials Science and Technology, Huazhong University of Science and Technology, Wuhan 430074, China.*

*E-mail: ywwen@mail.hust.edu.cn, bshan@mail.hust.edu.cn.*

*b. Key Laboratory for Green Chemical Technology of State Education Ministry, School of Chemical Engineering & Technology, Tianjin University, Tianjin 300072, China.*

*c. State Key Laboratory of Advanced Technologies for Comprehensive Utilization of Platinum Metal, Kunming Institute of Precious Metals, Kunming 650106, China.*

*d. State Key Laboratory of Digital Manufacturing Equipment and Technology and School of Mechanical Science and Engineering, Huazhong University of Science and Technology, Wuhan 430074, China.*

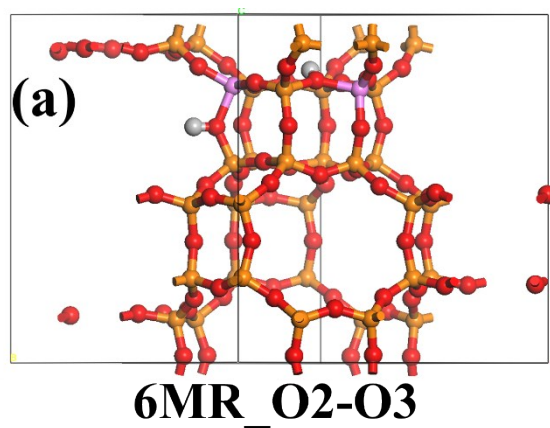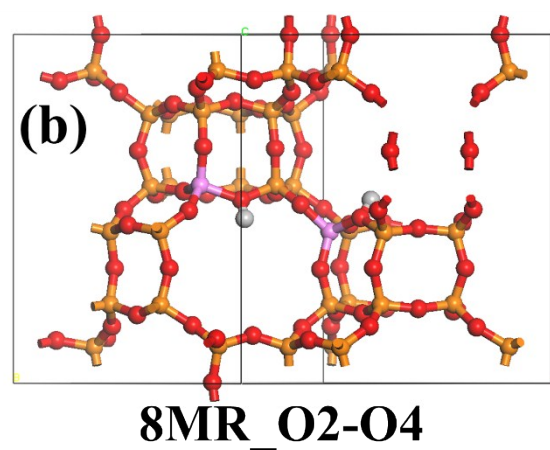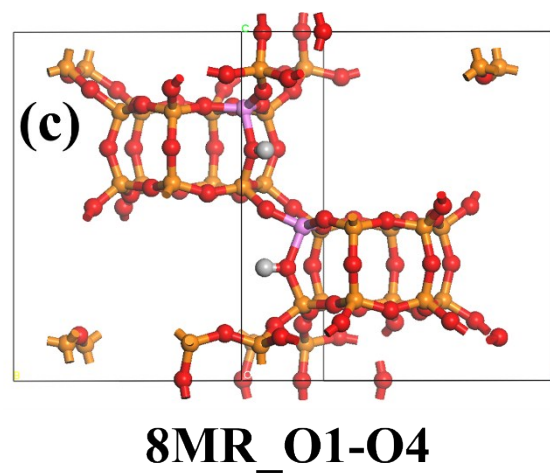

Figure S1. (a), (b) and (c) stand for the most stable  $Z_2H_2$  configuration with 6MR\_O2-O3, 8MR\_O2-O4 and 8MR\_O1-O4 frameworks, respectively.



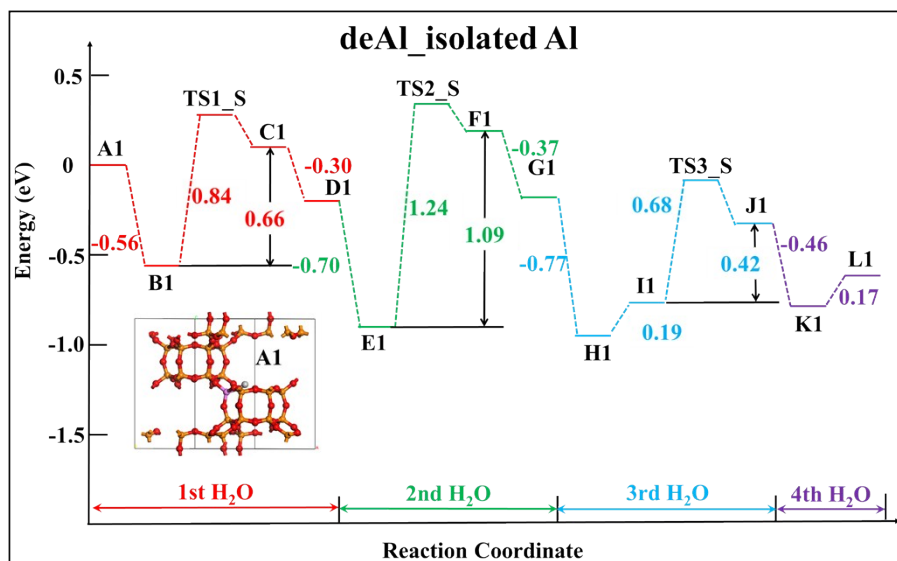

**Figure S2.** Detailed reaction energy and barriers of Al atom removed from the isolated Al framework in H-SSZ-13.

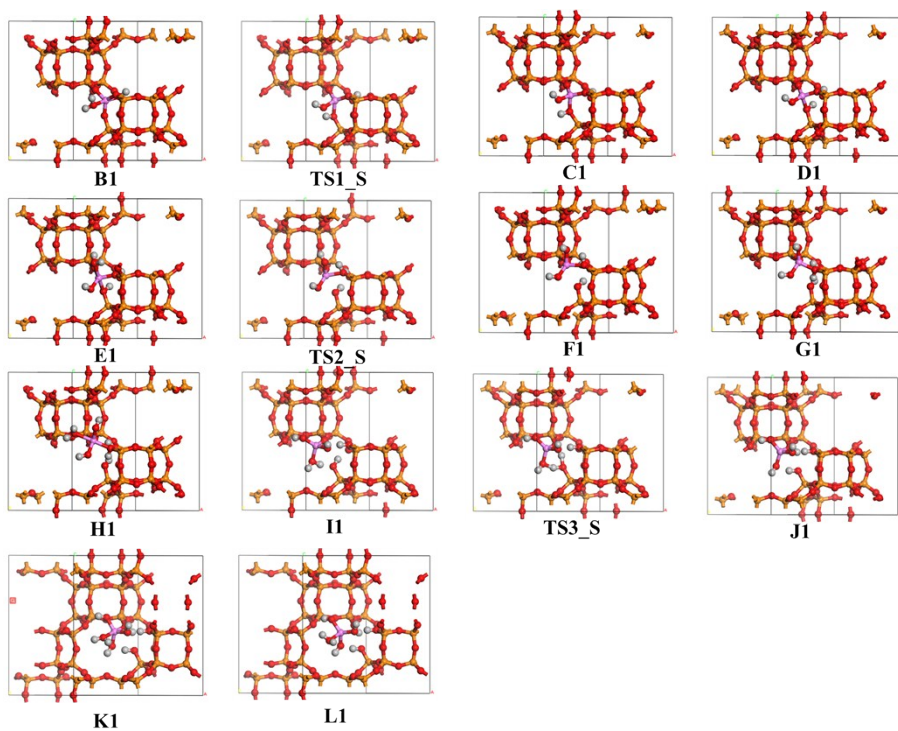

**Figure S3.** Reaction intermediates and transient structures for EFAL formation in the isolated Al framework, corresponding to Figure S2.

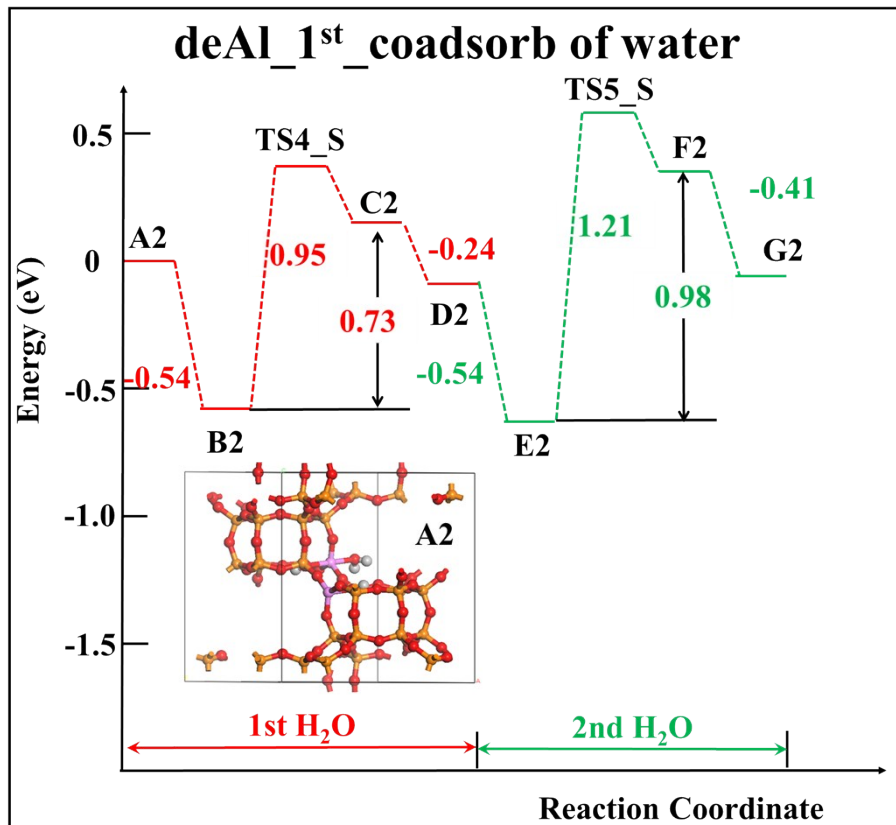

**Figure S4.** The reaction energy and barriers of the first two hydrolysis processes with two water molecules adsorb on different Al atoms.

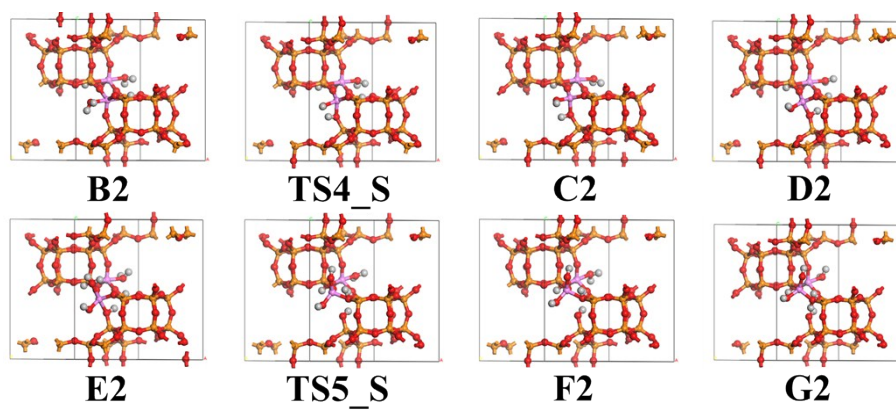

**Figure S5.** Reaction intermediates and transient structures for the first two hydrolysis processes with two water molecules adsorbed on different Al atoms, corresponding to Figure S4.

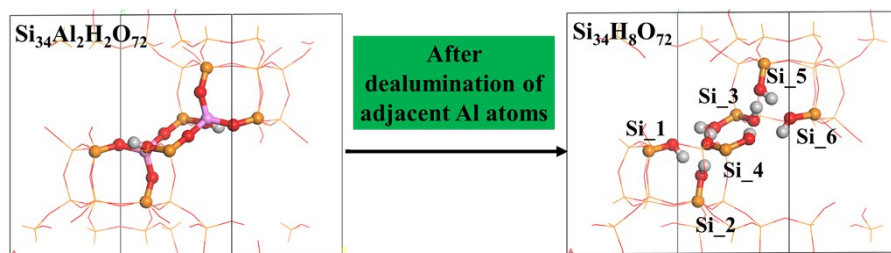

**Figure S6.** The transformation of adjacent Al atoms model ( $\text{Si}_{34}\text{Al}_2\text{H}_2\text{O}_{72}$ ) to  $\text{Si}_{34}\text{H}_8\text{O}_{72}$  after dealumination of adjacent Al atoms in the framework.



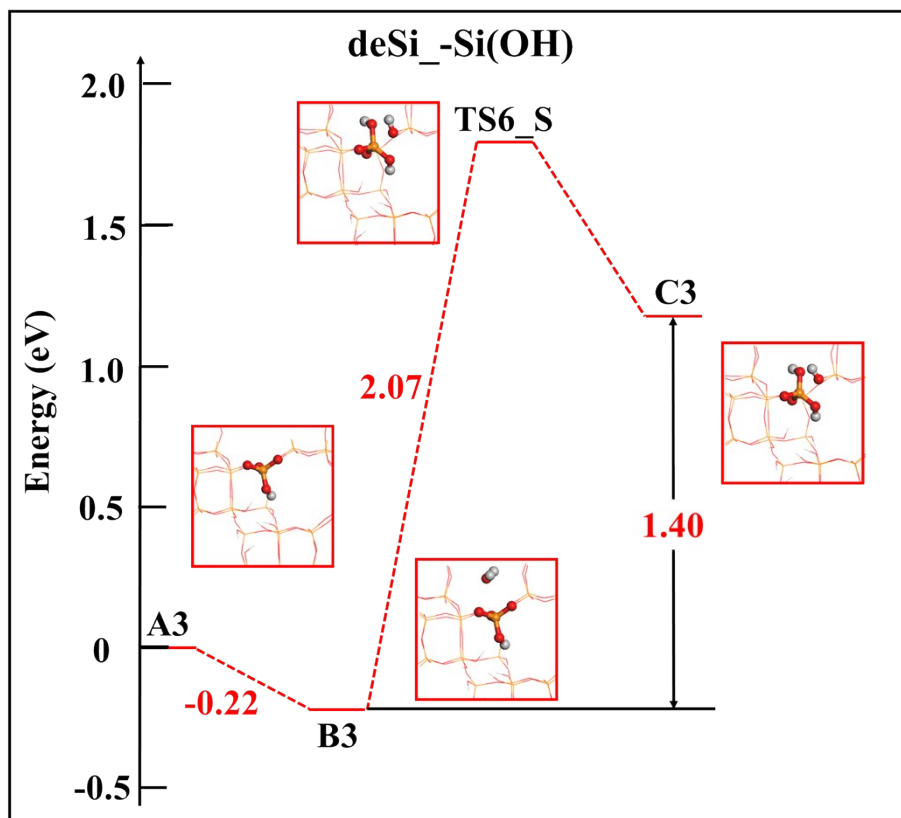

Figure S7. Detailed reaction energy and barrier of the first hydrolysis process during Si atom removed from the -Si(OH) local structure.

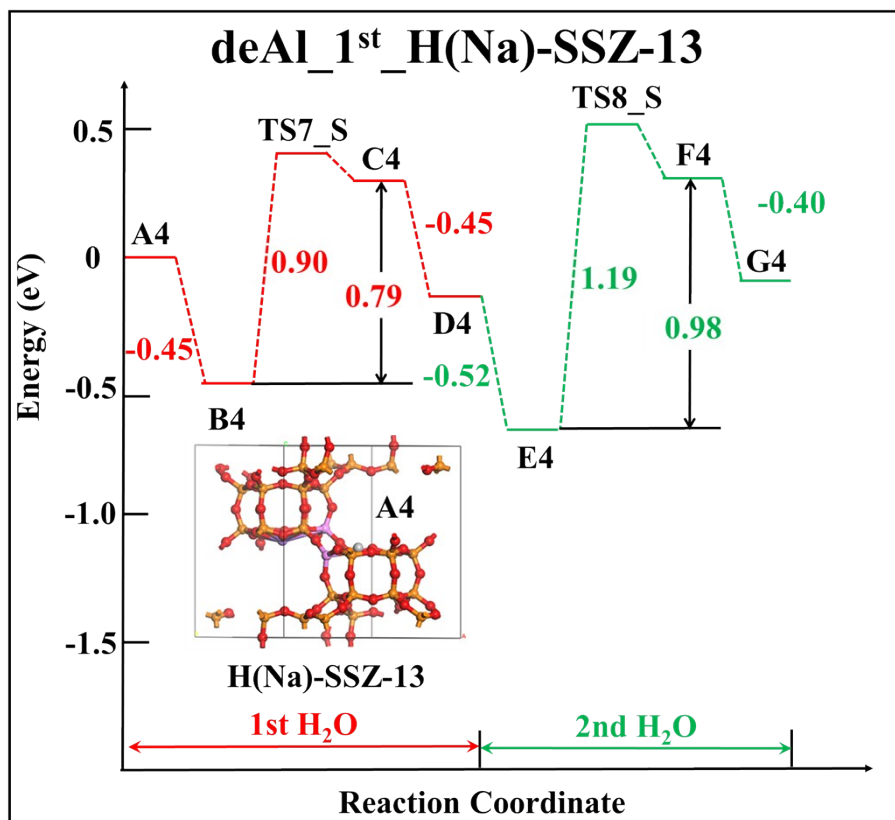

**Figure S8.** The reaction energy and barriers of the first two hydrolysis processes in H(Na)-SSZ-13.

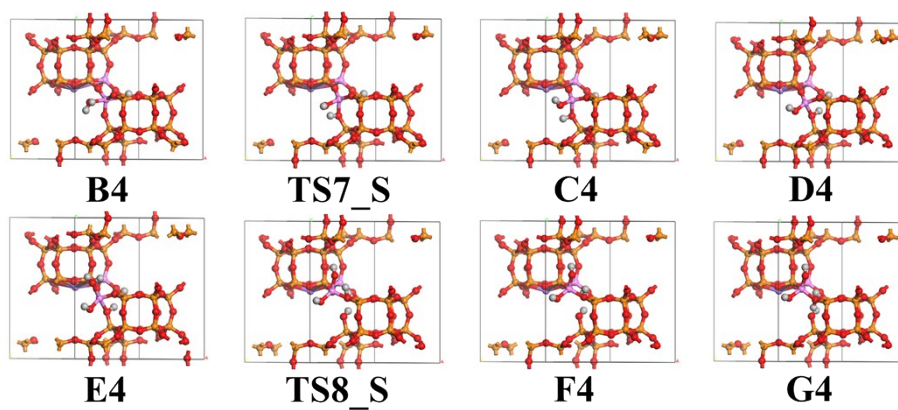

**Figure S9.** Reaction intermediates and transient structures for the first two hydrolysis processes in H(Na)-SSZ-13, corresponding to Figure S9.

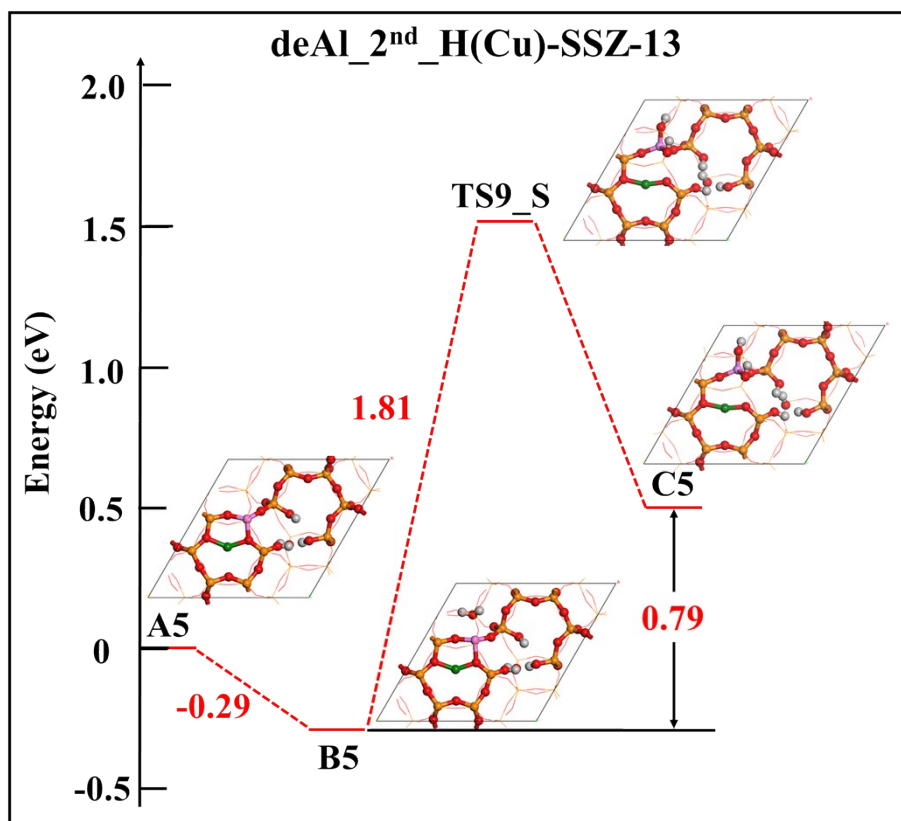

**Figure S10.** The detailed reaction barrier of first hydrolysis process with H(Cu)-SSZ-13, green ball = Cu.

Table S1. Number of relaxed atoms and imaginary frequencies calculated for each transition state.

| Transition states | Number of relaxed atoms | Number of imaginary frequencies |
|-------------------|-------------------------|---------------------------------|
| TS1               | 9                       | 1                               |
| TS2               | 10                      | 1                               |
| TS3               | 11                      | 1                               |
| TS4               | 9                       | 1                               |
| TS5               | 8                       | 1                               |
| TS6               | 11                      | 1                               |
| TS7               | 10                      | 2                               |
| TS8               | 11                      | 2                               |
| TS9               | 9                       | 1                               |
| TS1_S             | 9                       | 1                               |
| TS2_S             | 8                       | 1                               |
| TS3_S             | 11                      | 1                               |
| TS4_S             | 9                       | 1                               |
| TS5_S             | 10                      | 1                               |
| TS6_S             | 9                       | 2                               |
| TS7_S             | 9                       | 1                               |
| TS8_S             | 10                      | 1                               |
| TS9_S             | 9                       | 1                               |

INCAR files used for optimizations, transition states and frequencies calculation:

INCAR file used for optimizations

System = SSZ-13-dealumination

ISMear = 0

ISIF = 0

IVDW = 1

ENCUT = 400

ISPIN = 2

ALGO = FAST

NSW = 200

NELM = 99

IBRION = 2

LMAXMIX = 6

LWAVE = .FALSE.

LCHARG = .FALSE.

LPLANE = .FALSE.

EDIFF = 1E-6

EDIFFG = -0.02

INCAR file used for transition states search

System = TS

ISMear = 0

SIGMA = 0.1

ISIF = 0

IVDW = 1

ENCUT = 400

ISPIN = 2

ALGO = FAST

NSW = 1000

NELM = 99

IBRION = 3

LWAVE = .FALSE.

LCHARG = .FALSE.

LPLANE = .FALSE.

EDIFF = 1E-6

EDIFFG = -0.02

NPAR = 2

POTIM = 0.05

ICHAIN = 0

IMAGES = 6

SPRING = -5

LCLIMB = .T.

INCAR file used for frequency calculation

System = freq

ISMEAR = 0

ISIF = 0

IVDW = 1

ENCUT = 400

ISPIN = 2

ALGO = FAST

NSW = 1

NELM = 99

IBRION = 5

LMAXMIX = 6

LWAVE = .FALSE.

LCHARG = .FALSE.

LPLANE = .FALSE.

EDIFF = 1E-6

EDIFFG = -0.02

POTIM = 0.01

NFREE = 2
